# Supplementary material
Source: Research Square preprint supplement (doi:10.21203/rs.3.rs-8868920/v1)
Supplement: Supplementary file 1 [file 754be9ef174f58f83752916a.docx]

**Table. S1.** Average fatty acid compositions melting temperature and solid fat content, of pork fat, Palm olein and DAG-27%MAG.

| Samples | Pork fat | Palm olein | DAG-27%MAG |
| --- | --- | --- | --- |
| SFA | 42.36±0.06 | 44.98±0.02 | 45.20±0.46 |
| MUFA/PUFA | 3.10±0.01 | 3.63±0.00 | 3.67±0.03 |
| Melting temperature (°C) | 32.37±0.65 | 6.15±0.83 | 54.38±0.51 |
| SFC (%) | 18.53±0.16 | 1.11±1.01 | 38.03±0.45 |

SFC: Solid fat content at 25°C; SFA: Saturated fatty acid; MUFA/PUFA: Monounsaturated to polyunsaturated fatty acid ratio. Values indicate the mean and standard deviation of three replicates and represented as a mass percentage (% w/w). Values are means ± standard deviations of a minimum of three determinations. Mean values in the same column with different superscripts are significantly different.

**Table. S2.** Texture profile analysis results of adipose tissue mimetics with different structured lipids at before and after the 2 times of freeze-thaw.

| Samples |  | Hardness  (N) | Gumminess  (N) | Springiness (mm) | Cohesiveness  (−) | Chewiness  (N) |
| --- | --- | --- | --- | --- | --- | --- |
| Pork | Before | 439.50±3.89a | 7.00±2.12a | 1.21±0.10a | 0.49±0.10a | 2.15±0.25a |
| After | 320.43±7.00a | 2.50±1.77a | 1.22±0.18ab | 0.52±0.04a | 2.70±0.20a |
| PPI-SA  (DAG-27%MAG) | Before | 171.07±7.07a | 6.00±0.00a | 1.24±0.04a | 0.39±0.06a | 0.40±0.00a |
| After | 170.00±5.20a | 5.00±0.00a | 1.24±0.22a | 0.54±0.21a | 0.47±0.23a |
| PPF-SA  (DAG) | Before | 282.73±9.02b | 7.00±0.00a | 1.24±0.16a | 0.44±0.03a | 1.30±0.00a |
| After | 221.10±12.73b | 4.33±0.71a | 0.99±0.09a | 0.41±0.03a | 0.30±0.10b |
| PPF-SA  (DAG-8%MAG) | Before | 268.67±17.95b | 9.00±0.00a | 1.44±0.11b | 0.55±0.11a | 1.10±0.57a |
| After | 242.26±15.86b | 5.67±4.24a | 1.06±0.04ab | 0.47±0.17a | 0.30±0.26b |
| PPF-SA  (DAG-15%MAG) | Before | 231.10±14.14b | 7.00±0.71a | 1.56±0.11b | 0.56±0.04a | 1.00±0.28a |
| After | 243.09±13.03b | 9.67±0.71b | 1.22±0.14ab | 0.47±0.06b | 0.73±0.31b |
| PPF-SA  (DAG-27%MAG) | Before | 243.70±13.26b | 6.00±0.71a | 1.67±0.15b | 0.53±0.10a | 1.30±0.00a |
| After | 250.12±14.14b | 8.67±0.71b | 1.28±0.16b | 0.39±0.03b | 0.63±0.11b |

Values are means ± standard deviations of a minimum of three determinations. Mean values in the same column with different superscripts are significantly different.
